# Supplementary material
Source: publisher figshare collection journal article supplement (https://acs.figshare.com/ndownloader/files/3718936)
Supplement: Supplementary file 1 [file 3718936]

# Supporting Information

## **Integrated Three-Dimensional Carbon Paper/Carbon Tubes/Cobalt-Sulfide Sheets as an Efficient Electrode for Overall Water Splitting**

Jun Wang,<sup>†,‡</sup> Hai-xia Zhong,<sup>†,‡</sup> Zhong-li Wang,<sup>†</sup> Fan-lu Meng,<sup>†</sup> Xin-bo Zhang<sup>\*,†</sup>

<sup>†</sup>State Key Laboratory of Rare Earth Resource Utilization, Changchun Institute of Applied  
Chemistry, Chinese Academy of Sciences, Changchun 130022, P. R. China

<sup>‡</sup>University of Chinese Academy of Sciences, Beijing 100049, P. R. China



**Chemicals.** Zinc nitrate hexahydrate ( $\text{Zn}(\text{NO}_3)_2 \cdot 6\text{H}_2\text{O}$ , 99%), potassium permanganate ( $\text{KMnO}_4$ , 99%), cobalt nitrate hexahydrate ( $\text{Co}(\text{NO}_3)_2 \cdot 6\text{H}_2\text{O}$ , 99%), hexamethylenetetramine ( $\text{C}_6\text{H}_{12}\text{N}_4$ ,  $\geq 99.0\%$ ), tris(hydroxymethyl)aminomethane ( $\text{C}_4\text{H}_{11}\text{NO}_3$ , Tris,  $\geq 99.0\%$ ), thiourea ( $\text{CH}_4\text{N}_2\text{S}$ , 99%), ammonia solution ( $\text{NH}_3 \cdot \text{H}_2\text{O}$ , 25-28%), hydrochloric acid ( $\text{HCl}$ , 36%-38%), anhydrous ethanol ( $\text{C}_2\text{H}_5\text{OH}$ ) were purchased from Beijing Chemical Works. Potassium hydroxide ( $\text{KOH}$ , 98%) was purchased from Aladdin Reagent. Dopamine hydrochloride, Pt/C (20 wt%) and  $\text{RuO}_2$  were purchased from Sigma-Aldrich. Nafion solution (5 wt%) was purchased from DuPont. All chemical reagents were used as received without further purification. Deionized water with the specific resistance of  $18.2 \text{ M}\Omega \cdot \text{cm}$  was obtained by reversed osmosis followed by ion-exchange and filtration.



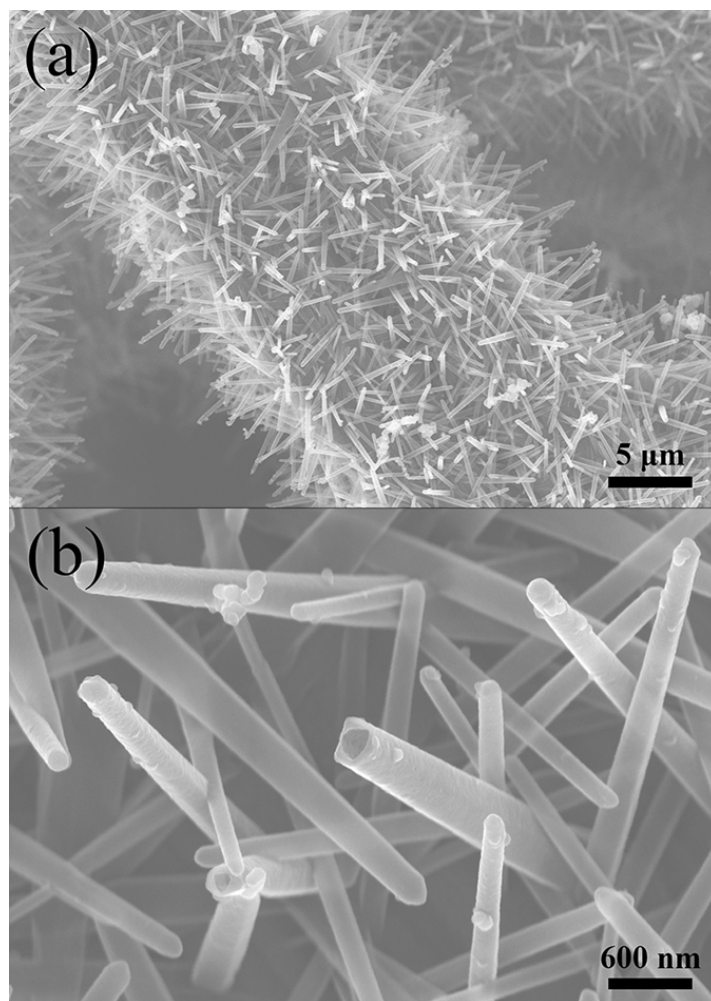

**Figure S1.** SEM images of CP/CTs.



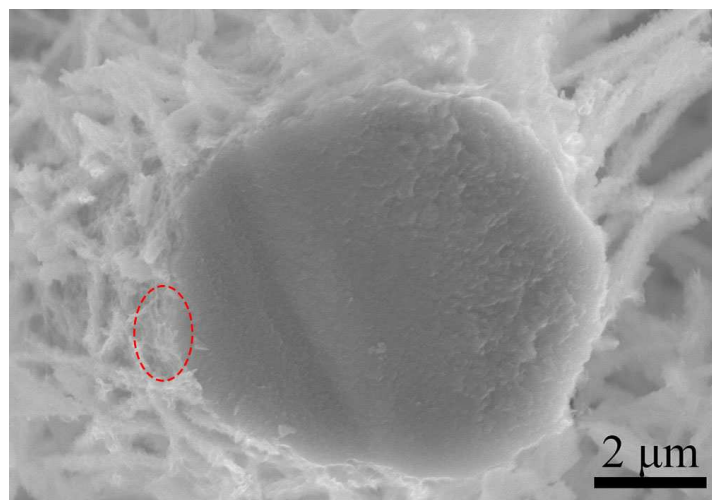

**Figure S2.** SEM image of the cross-sectional view of CP/CTs/Co-S sheets. The red circle indicates that Co-S sheets are also partly deposited on the skeleton of CP.



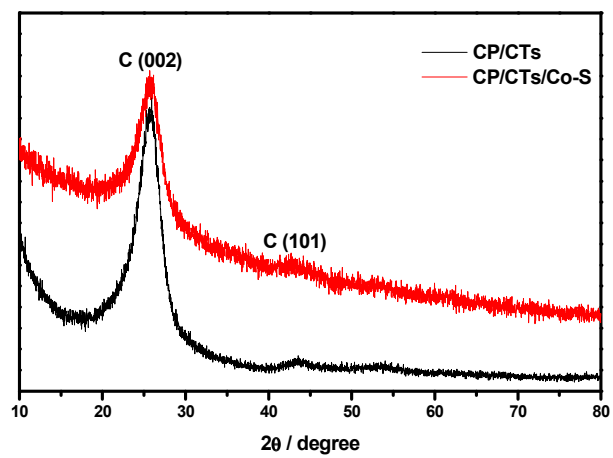

**Figure S3.** XRD patterns of CP/CTs and CP/CTs/Co-S.



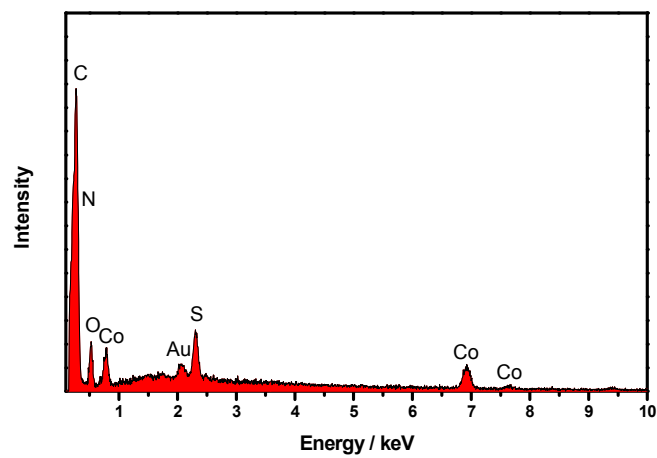

**Figure S4.** EDX spectrum of CP/CTs/Co-S. The Au signal is originated from the sputtered Au before test.



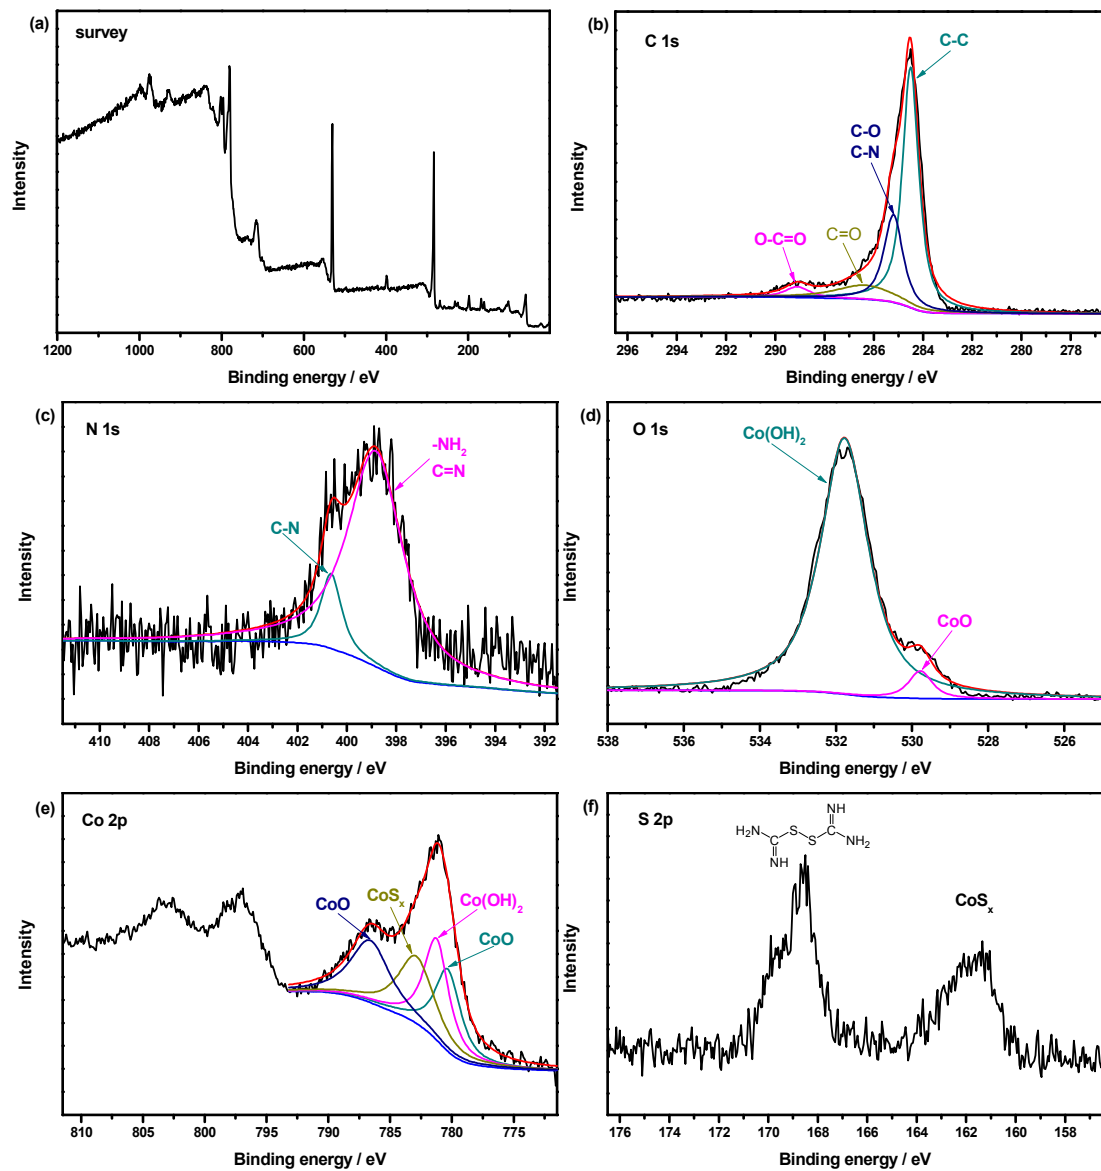

**Figure S5.** XPS spectra of (a) survey, (b) C 1s, (c) N 1s, (d) O 1s, (e) Co 2p, and (f) S 2p for CP/CTs/Co-S.



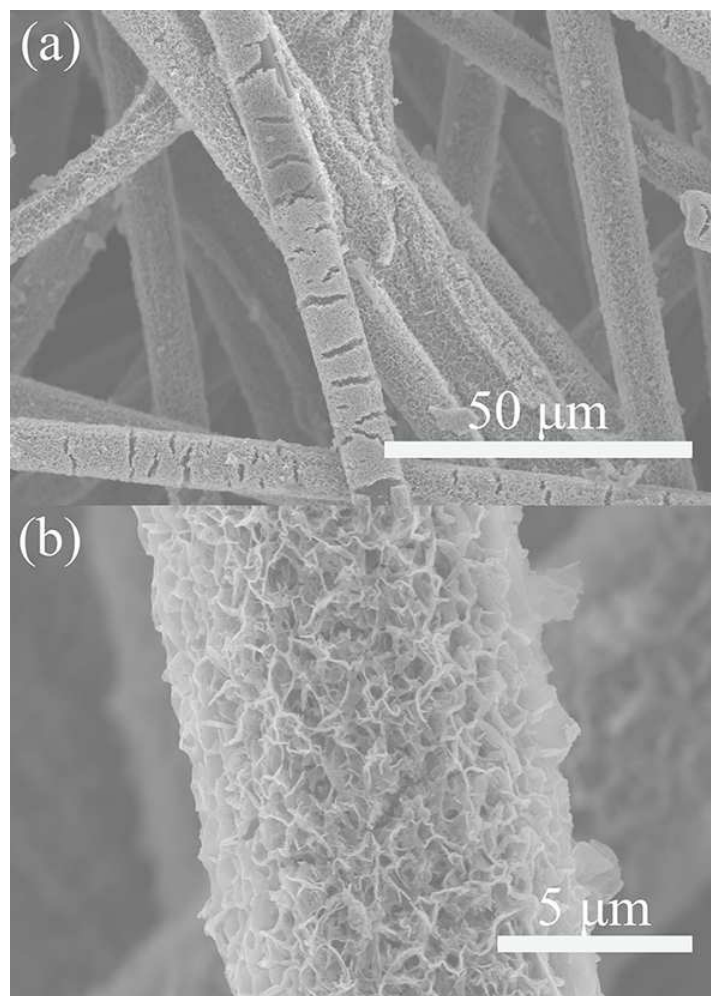

**Figure S6.** SEM images of CP/Co-S.



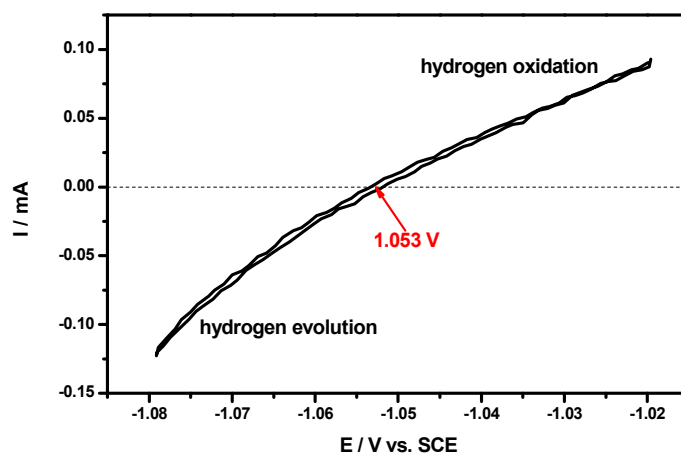

**Figure S7.** The calibration of SCE (saturated KCl) reference electrode with respect to RHE.

The calibration was performed in the high purity hydrogen saturated electrolyte (1 M KOH) with a Pt mesh as the working electrode. Cyclic voltammograms were run at a scan rate of  $1 \text{ mV s}^{-1}$ , and the average of the two potentials at which the current crossed zero was taken to be the thermodynamic potential for the hydrogen electrode reactions. Thus, in 1 M KOH,  $E(\text{RHE}) = E(\text{SCE}) + 1.053 \text{ V}$ .



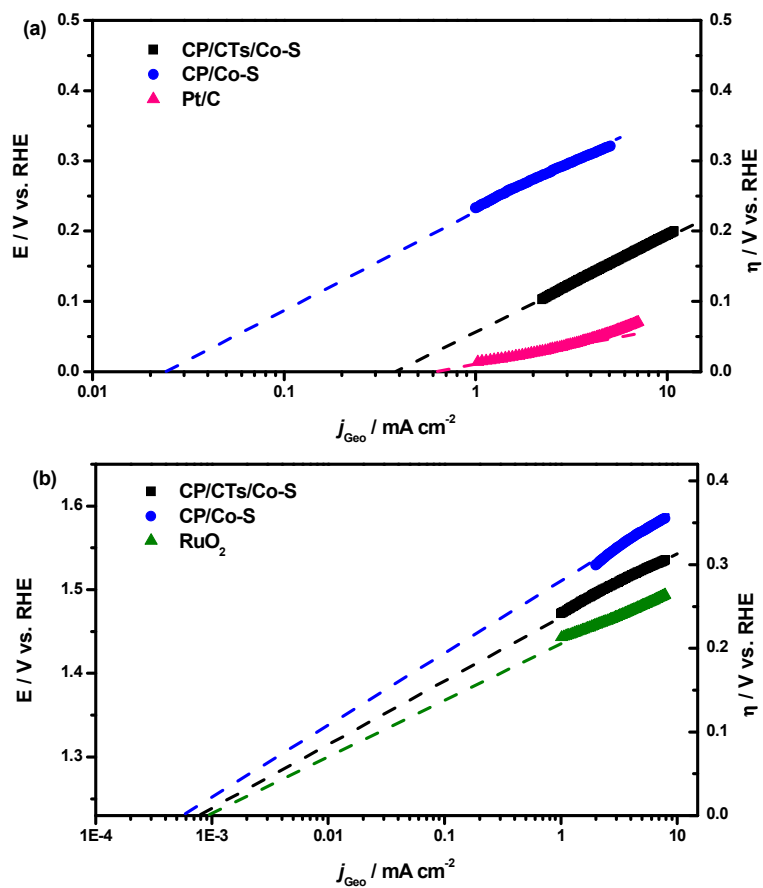

**Figure S8.** Exchange current densities for HER (a) and OER (b) calculated from Tafel plots by extrapolation method.



**Table S1.** Summary of the electrochemical activities of the catalytic electrodes for HER and OER.

|                        | E @ j = 10 mA cm <sup>-2</sup> (V) |       | Tafel slope (mV dec <sup>-1</sup> ) |     | Exchange current density (mA cm <sup>-2</sup> ) |                      |
|------------------------|------------------------------------|-------|-------------------------------------|-----|-------------------------------------------------|----------------------|
|                        | HER                                | OER   | HER                                 | OER | HER                                             | OER                  |
| <b>CP/CTs/Co-S</b>     | -0.190                             | 1.536 | 131                                 | 72  | 3.9×10 <sup>-1</sup>                            | 8.3×10 <sup>-4</sup> |
| <b>CP/Co-S</b>         | -0.357                             | 1.593 | 138                                 | 101 | 2.4×10 <sup>-2</sup>                            | 5.8×10 <sup>-4</sup> |
| <b>Pt/C</b>            | -0.090                             |       | 49                                  |     | 6.4×10 <sup>-1</sup>                            |                      |
| <b>RuO<sub>2</sub></b> |                                    | 1.501 |                                     | 55  |                                                 | 9.4×10 <sup>-4</sup> |



**Table S2.** Summary of the electrochemical activities of the catalytic electrodes for HER.

| Catalyst                                                            | Electrolyte | Loading<br>(mg cm <sup>-2</sup> ) | $\eta$ (HER) at j = 10<br>mA cm <sup>-2</sup> (mV) | TOF (s <sup>-1</sup> )                       | Tafel plot<br>(mV dec <sup>-1</sup> ) | Exchange current<br>(mA cm <sup>-2</sup> ) | Reference |
|---------------------------------------------------------------------|-------------|-----------------------------------|----------------------------------------------------|----------------------------------------------|---------------------------------------|--------------------------------------------|-----------|
| CP/CTs/Co-S                                                         | 1 M KOH     | 0.32                              | 190                                                | $1.2 \times 10^{-1}$<br>( $\eta = 0.25$ V)   | 131                                   | $3.9 \times 10^{-1}$                       | This work |
| FTO/Co-S                                                            | 1 M KOH     | 0.08                              | > 600                                              | $< 6.0 \times 10^{-3}$<br>( $\eta = 0.25$ V) |                                       |                                            | Ref. 1    |
| MoP                                                                 | 1 M KOH     | 0.86                              | ~140                                               |                                              | 48                                    | $4.6 \times 10^{-2}$                       | Ref. 2    |
| MoB                                                                 | 1 M KOH     | 2.3                               | ~220                                               |                                              | 59                                    | $2.0 \times 10^{-3}$                       | Ref. 3    |
| Mo <sub>2</sub> C                                                   | 1 M KOH     | ~0.8                              | ~190                                               |                                              | 54                                    | $3.8 \times 10^{-3}$                       | Ref. 3    |
| MoC <sub>x</sub>                                                    | 1 M KOH     | 0.8                               | 151                                                |                                              | 59                                    | $2.9 \times 10^{-2}$                       | Ref. 4    |
| Ti foil/Ni <sub>0.33</sub> Co <sub>0.67</sub> S <sub>2</sub><br>NWs | 1 M KOH     | 0.3                               | 88                                                 |                                              | 118                                   | 1.791                                      | Ref. 5    |
| CC/CoP                                                              | 1 M KOH     | 0.92                              | 209                                                |                                              | 129                                   |                                            | Ref. 6    |
| Ni <sub>2/3</sub> Fe <sub>1/3</sub> -rGO                            | 1 M KOH     | 0.25                              | ~560                                               |                                              | 210                                   |                                            | Ref. 7    |
| NiO/Ni-CNT                                                          | 1 M KOH     | 0.28                              | 80                                                 |                                              | 82                                    |                                            | Ref. 8    |
| CoO <sub>x</sub> @CN                                                | 1 M KOH     | 0.12                              | 232                                                |                                              |                                       |                                            | Ref. 9    |
| Co-NRCNTs                                                           | 1 M KOH     | 0.28                              | 370                                                |                                              |                                       |                                            | Ref. 10   |
| Ni foam/NiFe LDH                                                    | 1 M NaOH    |                                   | 210                                                |                                              |                                       |                                            | Ref. 11   |
| Ni@NC                                                               | 0.1 M KOH   | 0.4                               | 190                                                |                                              |                                       |                                            | Ref. 12   |
| MnNi                                                                | 0.1 M KOH   | 0.28                              | 360                                                |                                              |                                       |                                            | Ref. 13   |



**Table S3.** Summary of the electrochemical activities of the catalytic electrodes for OER.

| Catalyst                                                     | Electrolyte                      | Loading<br>(mg cm <sup>-2</sup> ) | $\eta(\text{OER})$<br>at j = 10<br>mA cm <sup>-2</sup><br>(mV) | TOF (s <sup>-1</sup> )                      | Tafel plot<br>(mV dec <sup>-1</sup> ) | Exchange<br>current (mA<br>cm <sup>-2</sup> ) | Reference |
|--------------------------------------------------------------|----------------------------------|-----------------------------------|----------------------------------------------------------------|---------------------------------------------|---------------------------------------|-----------------------------------------------|-----------|
| CP/CTs/Co-S                                                  | 1 M KOH                          | 0.32                              | 306                                                            | $1.6 \times 10^{-2}$<br>( $\eta = 0.3$ V)   | 72                                    | $8.3 \times 10^{-4}$                          | This work |
| Exfoliated NiFe LDH                                          | 1 M KOH                          | 0.07                              | 302                                                            | $5.0 \times 10^{-2}$<br>( $\eta = 0.3$ V)   | 40                                    |                                               | Ref. 14   |
| Exfoliated CoMn LDH                                          | 1 M KOH                          | 0.142                             | 324                                                            | $9.0 \times 10^{-3}$<br>( $\eta = 0.3$ V)   | 43                                    |                                               | Ref. 15   |
| FTO/CoHCF                                                    | 50 mM<br>KPi/1M KNO <sub>3</sub> |                                   |                                                                | $2.0 \times 10^{-3}$<br>( $\eta = 0.3$ V)   | 88                                    |                                               | Ref. 16   |
| Zn-Co-LDH                                                    | 0.1 M KOH                        | 0.28                              | ~520                                                           | $6.1 \times 10^{-2}$<br>( $\eta = 0.41$ V)  |                                       |                                               | Ref. 17   |
| $\alpha$ -Ni(OH) <sub>2</sub> Spheres                        | 0.1 M KOH                        | 0.2                               | 331                                                            | $3.61 \times 10^{-2}$<br>( $\eta = 0.35$ V) | 42                                    |                                               | Ref. 18   |
| Ti foil/Ni <sub>x</sub> Co <sub>3-x</sub> O <sub>4</sub> NWs | 1 M NaOH                         | 2.3                               | ~370                                                           |                                             | 64                                    | $8.8 \times 10^{-6}$                          | Ref. 19   |
| Stainless steel/Co <sub>3</sub> O <sub>4</sub>               | 1 M KOH                          |                                   | ~400                                                           |                                             | 49                                    | $2.0 \times 10^{-7}$                          | Ref. 20   |
| CoO <sub>x</sub> @CN                                         | 1 M KOH                          | 1                                 | 232                                                            |                                             |                                       |                                               | Ref. 9    |
| Ti foil/NiCo <sub>2</sub> O <sub>4</sub> NWs                 | 1 M KOH                          | 0.3                               | ~370                                                           |                                             | 60                                    |                                               | Ref. 5    |
| Ni foam/NiFe LDH                                             | 1 M NaOH                         |                                   | 240                                                            |                                             |                                       |                                               | Ref. 11   |
| Ni@NC                                                        | 0.1 M KOH                        | 0.4                               | 390                                                            |                                             | 40                                    |                                               | Ref. 12   |
| MnNi                                                         | 0.1 M KOH                        | 0.28                              | 420                                                            |                                             |                                       |                                               | Ref. 13   |
| Ni foam/Co <sub>3</sub> O <sub>4</sub> /N-rmGO               | 1 M KOH                          | 1                                 | 310                                                            |                                             | 67                                    |                                               | Ref. 21   |
| Mn <sub>3</sub> O <sub>4</sub> /CoSe <sub>2</sub>            | 0.1 M KOH                        | 0.2                               | 450                                                            |                                             | 49                                    |                                               | Ref. 22   |
| Cu foil/Co <sub>3</sub> O <sub>4</sub> C-NA                  | 0.1 M KOH                        | ~0.2                              | 290                                                            |                                             | 70                                    |                                               | Ref. 23   |
| Ti foil/Zn <sub>x</sub> Co <sub>3-x</sub> O <sub>4</sub> NWs | 1 M KOH                          | ~1                                | 320                                                            |                                             | 51                                    |                                               | Ref. 24   |



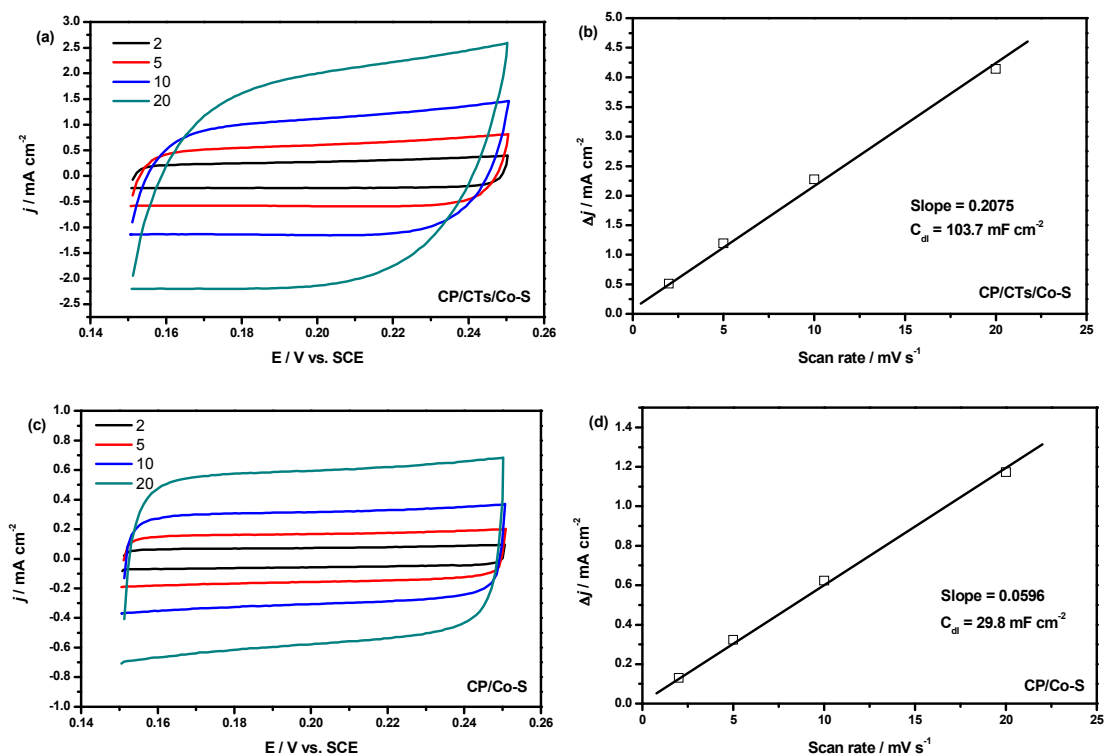

**Figure S9.** (a, c) Cyclic voltammograms and (b, d) the capacitive currents at 0.20 V vs. SCE as a function of scan rate for CP/CTs/Co-S and CP/Co-S in 1 M KOH.

The effective surface areas of CP/CTs/Co-S and CP/Co-S were compared by estimating their electrochemical double layer capacitances ( $C_{dl}$ ) with cyclic voltammograms (CVs). CVs were performed at a potential range of 0.15-0.25 V vs. SCE where no obvious electrochemical features corresponding to the Faradic current were observed (Figure S9a and c). The capacitive currents,  $\Delta j(j_a - j_c)@0.2 \text{ V}$ , were plotted against the scan rate (Figure S9b and d). The linear relationships were observed with the slopes twice of the  $C_{dl}$  value. Accordingly, the  $C_{dl}$  values for CP/CTs/Co-S and CP/Co-S were calculated to be 103.7 and 29.8  $\text{mF cm}^{-2}$ , respectively.



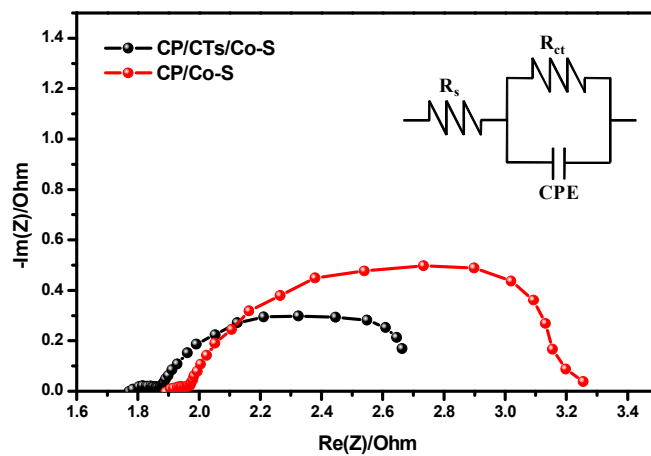

**Figure S10.** Electrochemical impedance spectroscopy obtained by applying an AC voltage with the amplitude of the sinusoidal voltage of 10 mV over a frequency range from 200 kHz to 100 mHz for CP/CTs/Co-S and CP/Co-S at HER overpotential of 0.2 V (Inset: the equivalent circuit diagram).



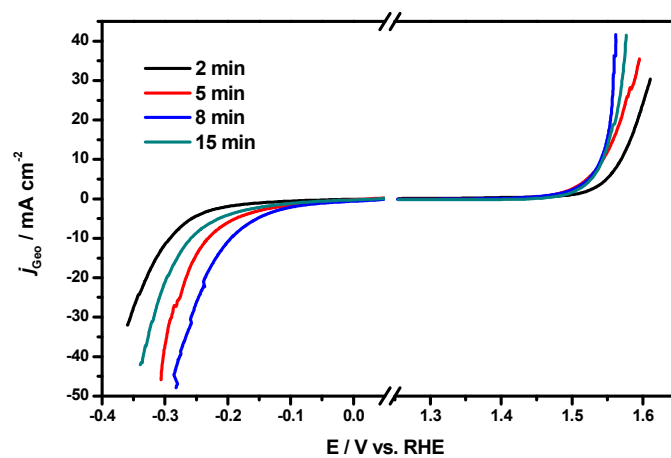

**Figure S11.** Polarization curves of CP/CTs/Co-S prepared with different deposition time for HER and OER in 1 M KOH with a scan rate of  $2 \text{ mV s}^{-1}$ .



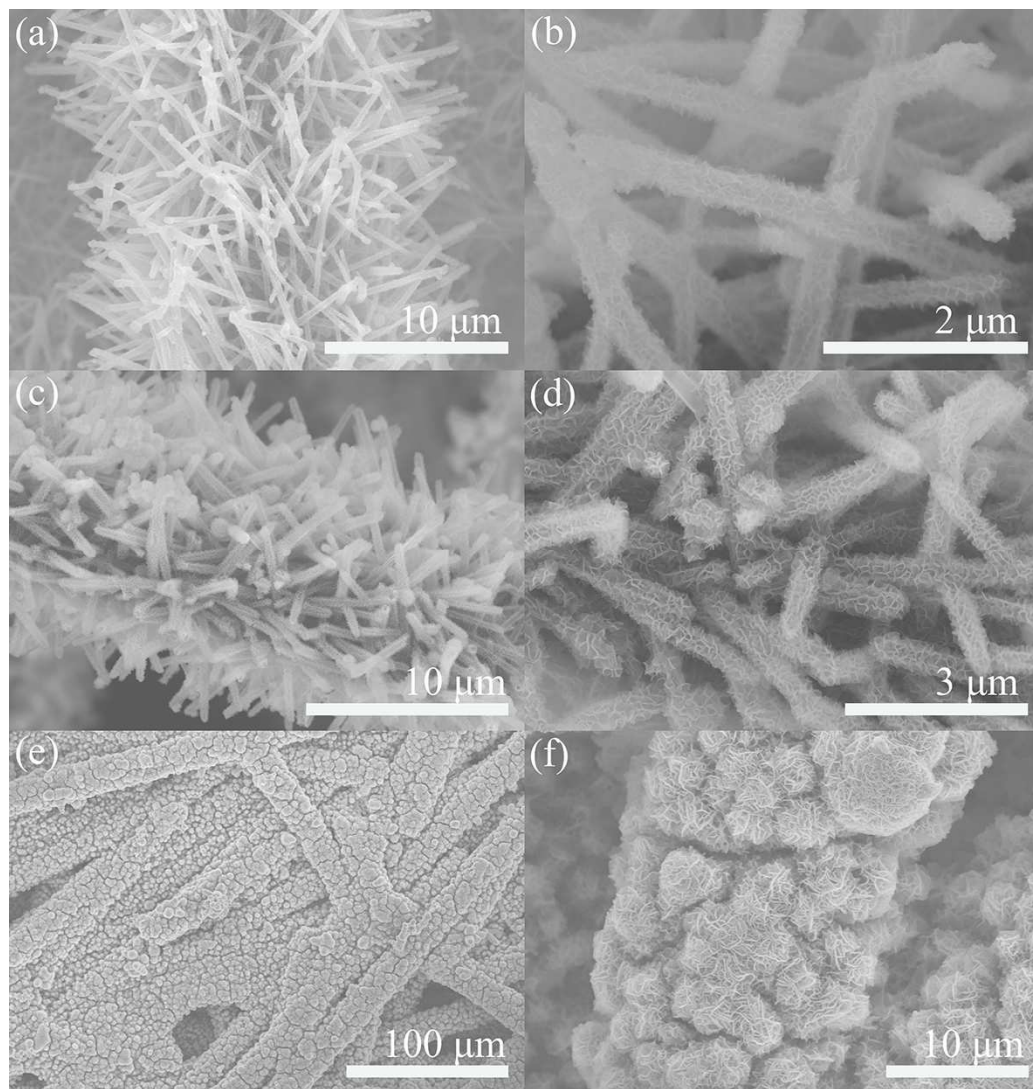

**Figure S12.** SEM images of CP/CTs/Co-S prepared via chronoamperometric electrodeposition at -0.9 V vs Ag/AgCl with different time: (a, b) 2, (c, d) 5, and (e, f) 15 min.



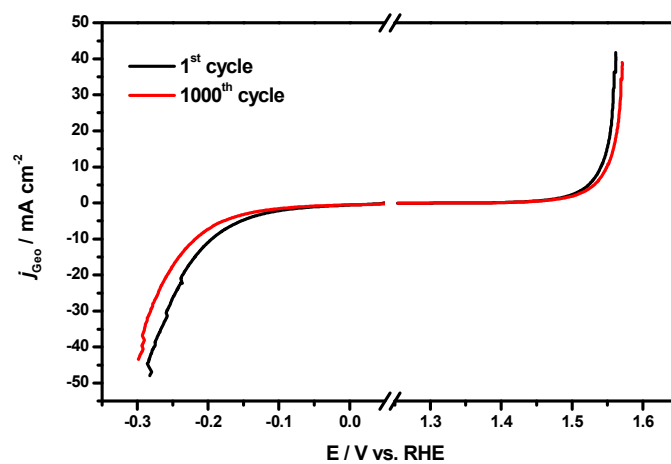

**Figure S13.** Polarization curves of CP/CTs/Co-S for HER and OER before and after 1000 cycles ( $50 \text{ mV s}^{-1}$ ) in 1 M KOH with a scan rate of  $2 \text{ mV s}^{-1}$ .



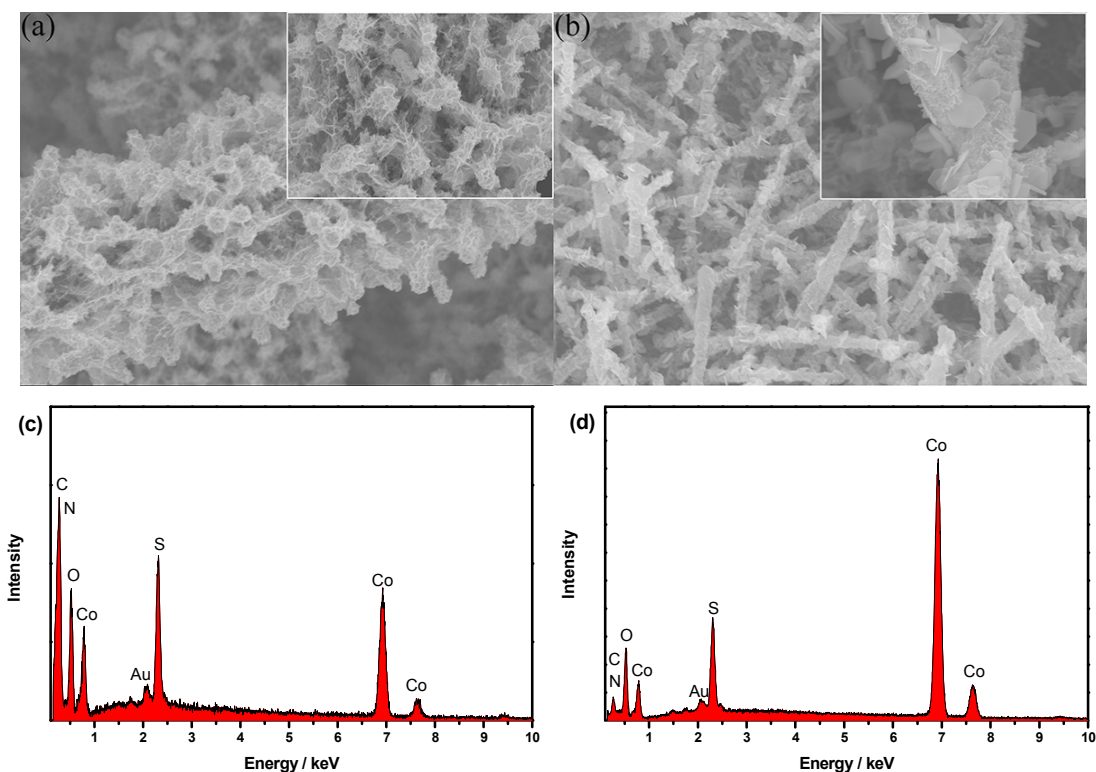

**Figure S14.** SEM images (a, b) and EDX spectra (c, d) of CP/CTs/Co-S after stability test for HER (a, c) and OER (b, d).

The SEM image in Figure S14a reveals that CP/CTs/Co-S almost maintains the sheet morphology after stability test for HER. And the EDX analysis (Figure S14c) shows a Co/S ratio of  $\sim 1.6$ , suggesting a small amount of S loss. However, after OER process, the formation of many regular plates on the surface of CTs is observed (Figure S14b) and the Co/S ratio is increased to  $\sim 5$  (Figure S14d), indicating the weak stability of  $\text{CoS}_x$  under OER condition.



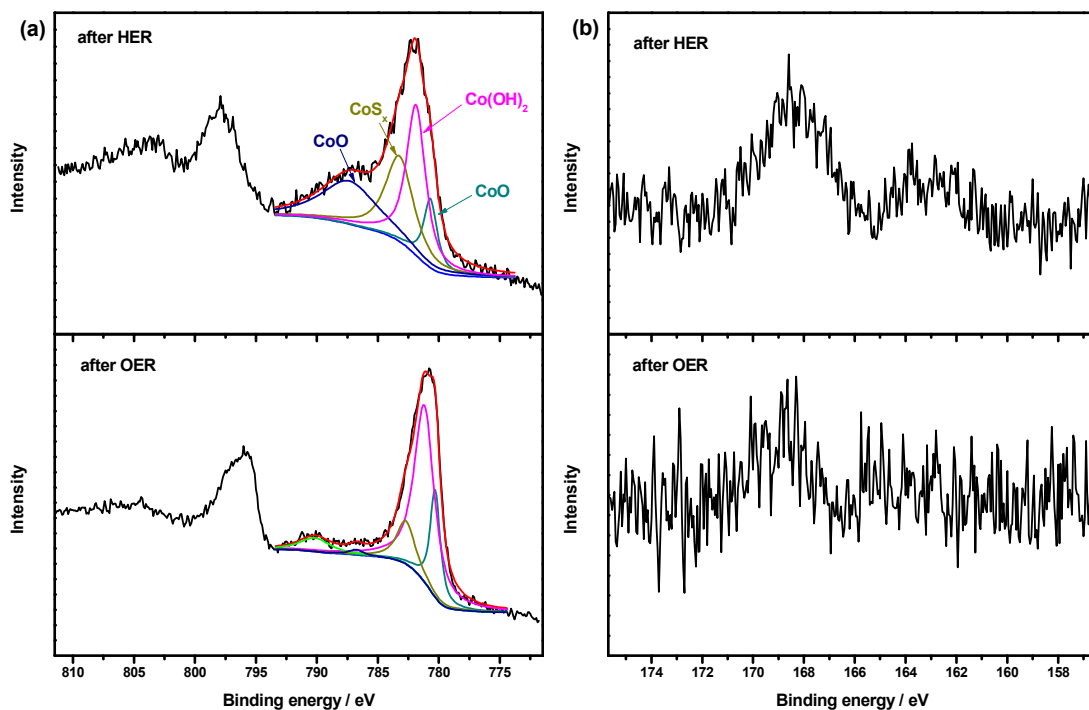

**Figure S15.** XPS spectra of (a) Co 2p and (b) S 2p for CP/CTs/Co-S after stability test for HER and OER.

In comparison with XPS spectra in Figure S5, the main component in CP/CTs/Co-S after stability test for OER converts to Co(OH)<sub>2</sub>, consistent with the observations from Figure S14b and S14d.



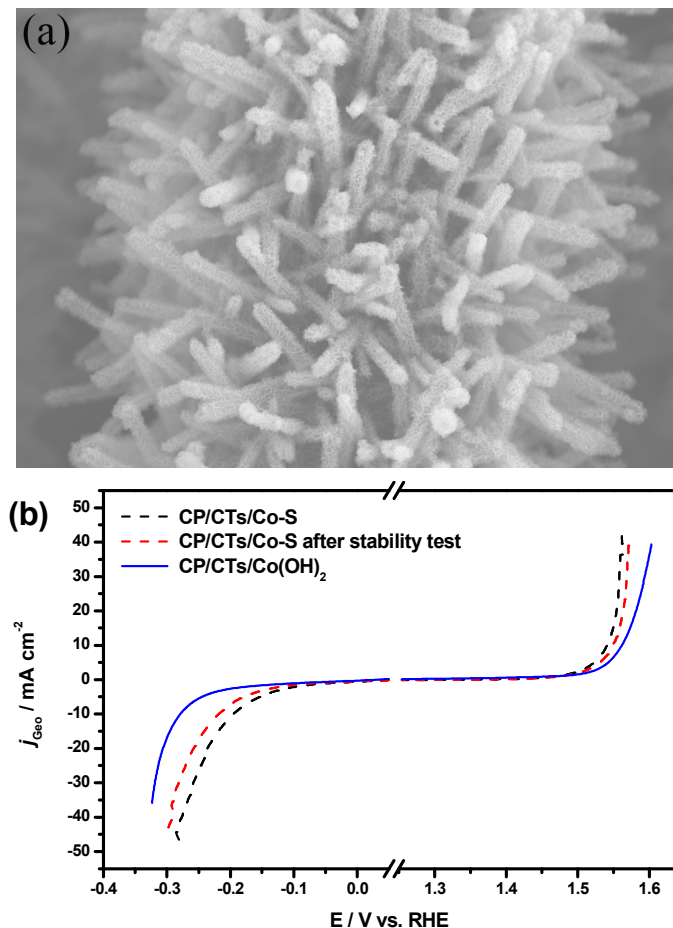

**Figure S16.** (a) SEM image of CP/CTs/Co(OH)<sub>2</sub> and (b) the according HER and OER activities in comparison with CP/CTs/Co-S before and after stability test.

For comparison, CP/CTs/Co(OH)<sub>2</sub> was also prepared via the similar electrodeposition method in absence of thiourea with the passed charges equivalent to that of CP/CTs/Co-S. The as-prepared CP/CTs/Co(OH)<sub>2</sub> have a similar morphology with CP/CTs/Co-S (Figure S16a). However, as shown in Figure S16b, the HER and OER activities of CP/CTs/Co(OH)<sub>2</sub> are even inferior to those of CP/CTs/Co-S after stability test, indicating the advantages of the Co-S composites.



**Table S4.** Summary of the electrochemical activities of the catalytic electrodes for overall water splitting.

| Catalytic electrode                                                    |                                                 | Electrolyte  | Loading<br>(mg cm <sup>-2</sup> ) | E at j = 10 mA<br>cm <sup>-2</sup> (V) | Specific<br>activity (mA<br>cm <sup>-2</sup> ) | Mass activity<br>(mA mg <sup>-1</sup> ) | Reference |
|------------------------------------------------------------------------|-------------------------------------------------|--------------|-----------------------------------|----------------------------------------|------------------------------------------------|-----------------------------------------|-----------|
| Cathode                                                                | Anode                                           |              |                                   |                                        |                                                |                                         |           |
| CP/CTs/Co-S                                                            |                                                 | 1 M KOH      | 0.32                              | 1.743                                  | 5.1 (1.7 V)                                    | 15.9 (1.7 V)                            | This work |
| Ni foam/NiFe LDH                                                       |                                                 | 1 M NaOH     |                                   | 1.7                                    | 20 (~1.78)                                     |                                         | Ref. 11   |
| Ni<br>foam/NiO/Ni-CNT                                                  | Ni foam/NiFe LDH                                | 1 M KOH      | 8                                 | ~1.41                                  | 20 (1.5 V)                                     | 2.5 (1.5 V)                             | Ref. 8    |
|                                                                        |                                                 |              |                                   |                                        | 100 (1.58 V)                                   | 12.5 (1.58 V)                           |           |
| Ni<br>foam/CoO <sub>x</sub> @CN                                        | Ni foam/CoO <sub>x</sub> @CN<br>after HER       | 1 M KOH      | 2                                 | ~1.32                                  | 20 (1.55 V)                                    | 10 (1.55 V)                             | Ref. 9    |
|                                                                        |                                                 |              |                                   |                                        | ~27 (1.7 V)                                    | ~13.5 (1.7 V)                           |           |
| Ti<br>foil/Ni <sub>0.33</sub> Co <sub>0.67</sub> S <sub>2</sub><br>NWs | Ti foil/NiCo <sub>2</sub> O <sub>4</sub><br>NWs | 1 M KOH      | 0.3                               | ~1.73                                  | ~8 (1.7 V)                                     | ~26.7 (1.7 V)                           | Ref. 5    |
| MnNi                                                                   | MnNi after thermal<br>modification              | 0.1 M<br>KOH | 0.28                              | ΔE= 2.01                               |                                                |                                         | Ref. 13   |
| Ni <sub>2/3</sub> Fe <sub>1/3</sub> -rGO                               |                                                 | 1 M KOH      | 0.25                              | ΔE= ~2.02                              |                                                |                                         | Ref. 7    |
| Ni@NC                                                                  |                                                 | 0.1 M<br>KOH | 0.4                               | ΔE= 1.81                               |                                                |                                         | Ref. 12   |

\*The value of ΔE was roughly estimated by adding the absolute potentials of the catalytic electrode at the current density of 10 mA cm<sup>-2</sup> for HER and OER, respectively.



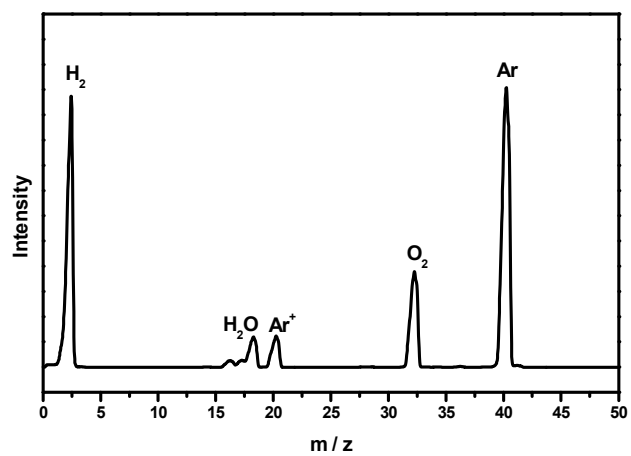

**Figure S17.** Mass spectrum of the gaseous products from overall water splitting with Ar as carrier gas.



## Reference

- (1) Sun, Y.; Liu, C.; Grauer, D. C.; Yano, J.; Long, J. R.; Yang, P.; Chang, C. J. Electrodeposited Cobalt-Sulfide Catalyst for Electrochemical and Photoelectrochemical Hydrogen Generation from Water. *J. Am. Chem. Soc.* **2013**, *135*, 17699-17702.
- (2) Xiao, P.; Sk, M. A.; Thia, L.; Ge, X.; Lim, R. J.; Wang, J. Y.; Lim, K. H.; Wang, X. Molybdenum Phosphide as an Efficient Electrocatalyst for the Hydrogen Evolution Reaction. *Energy Environ. Sci.* **2014**, *7*, 2624-2629.
- (3) Vrubel, H.; Hu, X. Molybdenum Boride and Carbide Catalyze Hydrogen Evolution in both Acidic and Basic Solutions. *Angew. Chem., Int. Ed.* **2012**, *51*, 12703-12706.
- (4) Wu, H. B.; Xia, B. Y.; Yu, L.; Yu, X. Y.; Lou, X. W. Porous Molybdenum Carbide Nano-Octahedrons Synthesized *via* Confined Carburization in Metal-Organic Frameworks for Efficient Hydrogen Production. *Nat. Commun.* **2015**, *6*, 6512.
- (5) Peng, Z.; Jia, D.; Al-Enizi, A. M.; Elzatahry, A. A.; Zheng, G. From Water Oxidation to Reduction: Homologous Ni-Co Based Nanowires as Complementary Water Splitting Electrocatalysts. *Adv. Energy Mater.* **2015**, *5*, 1402031.
- (6) Tian, J.; Liu, Q.; Asiri, A. M.; Sun, X. Self-Supported Nanoporous Cobalt Phosphide Nanowire Arrays: An Efficient 3D Hydrogen-Evolving Cathode over the Wide Range of pH 0-14. *J. Am. Chem. Soc.* **2014**, *136*, 7587-7590.
- (7) Ma, W.; Ma, R.; Wang, C.; Liang, J.; Liu, X.; Zhou, K.; Sasaki, T. A Superlattice of Alternately Stacked Ni-Fe Hydroxide Nanosheets and Graphene for Efficient Splitting of Water. *ACS Nano* **2015**, *9*, 1977-1984.
- (8) Gong, M.; Zhou, W.; Tsai, M. C.; Zhou, J.; Guan, M.; Lin, M. C.; Zhang, B.; Hu, Y.; Wang, D. Y.;



- Yang, J.; Pennycook, S. J.; Hwang, B. J.; Dai, H. Nanoscale Nickel Oxide/Nickel Heterostructures for Active Hydrogen Evolution Electrocatalysis. *Nat. Commun.* **2014**, *5*, 4695.
- (9) Jin, H.; Wang, J.; Su, D.; Wei, Z.; Pang, Z.; Wang, Y. In Situ Cobalt-Cobalt Oxide/N-Doped Carbon Hybrids as Superior Bifunctional Electrocatalysts for Hydrogen and Oxygen Evolution. *J. Am. Chem. Soc.* **2015**, *137*, 2688-2694.
- (10) Zou, X.; Huang, X.; Goswami, A.; Silva, R.; Sathe, B. R.; Mikmekova, E.; Asefa, T. Cobalt-Embedded Nitrogen-Rich Carbon Nanotubes Efficiently Catalyze Hydrogen Evolution Reaction at All pH Values. *Angew. Chem., Int. Ed.* **2014**, *53*, 4372-4376.
- (11) Luo, J.; Im, J. H.; Mayer, M. T.; Schreier, M.; Nazeeruddin, M. K.; Park, N. G.; Tilley, S. D.; Fan, H. J.; Grätzel, M. Water Photolysis at 12.3% Efficiency via Perovskite Photovoltaics and Earth-Abundant Catalysts. *Science* **2014**, *345*, 1593-1596.
- (12) Ren, J.; Antonietti, M.; Feller, T. P. Efficient Water Splitting Using a Simple Ni/N/C Paper Electrocatalyst. *Adv. Energy Mater.* **2015**, *5*, 1401660.
- (13) Ledendecker, M.; Clavel, G.; Antonietti, M.; Shalom, M. Highly Porous Materials as Tunable Electrocatalysts for the Hydrogen and Oxygen Evolution Reaction. *Adv. Funct. Mater.* **2015**, *25*, 393-399.
- (14) Song, F.; Hu, X. Exfoliation of Layered Double Hydroxides for Enhanced Oxygen Evolution Catalysis. *Nat. Commun.* **2014**, *5*, 4477.
- (15) Song, F.; Hu, X. Ultrathin Cobalt-Manganese Layered Double Hydroxide Is an Efficient Oxygen Evolution Catalyst. *J. Am. Chem. Soc.* **2014**, *136*, 16481-16484.
- (16) Pintado, S.; Goberna-Ferron, S.; Escudero-Adan, E. C.; Galan-Mascaros, J. R. Fast and Persistent Electrocatalytic Water Oxidation by Co-Fe Prussian Blue Coordination Polymers. *J. Am. Chem. Soc.*



**2013**, *135*, 13270-13273.

- (17) Zou, X.; Goswami, A.; Asefa, T. Efficient Noble Metal-Free (Electro)Catalysis of Water and Alcohol Oxidations by Zinc-Cobalt Layered Double Hydroxide. *J. Am. Chem. Soc.* **2013**, *135*, 17242-17245.
- (18) Gao, M.; Sheng, W.; Zhuang, Z.; Fang, Q.; Gu, S.; Jiang, J.; Yan, Y. Efficient Water Oxidation Using Nanostructured  $\alpha$ -Nickel-Hydroxide as an Electrocatalyst. *J. Am. Chem. Soc.* **2014**, *136*, 7077-7084.
- (19) Li, Y.; Hasin, P.; Wu, Y.  $\text{Ni}_x\text{Co}_{3-x}\text{O}_4$  Nanowire Arrays for Electrocatalytic Oxygen Evolution. *Adv. Mater.* **2010**, *22*, 1926-1929.
- (20) Koza, J. A.; He, Z.; Miller, A. S.; Switzer, J. A. Electrodeposition of Crystalline  $\text{Co}_3\text{O}_4$ —A Catalyst for the Oxygen Evolution Reaction. *Chem. Mater.* **2012**, *24*, 3567-3573.
- (21) Liang, Y.; Li, Y.; Wang, H.; Zhou, J.; Wang, J.; Regier, T.; Dai, H.  $\text{Co}_3\text{O}_4$  Nanocrystals on Graphene as a Synergistic Catalyst for Oxygen Reduction Reaction. *Nat. Mater.* **2011**, *10*, 780-786.
- (22) Gao, M. R.; Xu, Y. F.; Jiang, J.; Zheng, Y. R.; Yu, S. H. Water Oxidation Electrocatalyzed by an Efficient  $\text{Mn}_3\text{O}_4/\text{CoSe}_2$  Nanocomposite. *J. Am. Chem. Soc.* **2012**, *134*, 2930-2933.
- (23) Ma, T. Y.; Dai, S.; Jaroniec, M.; Qiao, S. Z. Metal-Organic Framework Derived Hybrid  $\text{Co}_3\text{O}_4$ -Carbon Porous Nanowire Arrays as Reversible Oxygen Evolution Electrodes. *J. Am. Chem. Soc.* **2014**, *136*, 13925-13931.
- (24) Liu, X.; Chang, Z.; Luo, L.; Xu, T.; Lei, X.; Liu, J.; Sun, X. Hierarchical  $\text{Zn}_x\text{Co}_{3-x}\text{O}_4$  Nanoarrays with High Activity for Electrocatalytic Oxygen Evolution. *Chem. Mater.* **2014**, *26*, 1889-1895.
